# Supplementary material for: Reprograming of gut microbiome energy metabolism by the FUT2 Crohn's disease risk polymorphism
Source: PubMed Central journal article supplement — ISME J. 2014 Apr 29;8(11):2193–206. doi: 10.1038/ismej.2014.64 (PMC4992076; doi:10.1038/ismej.2014.64), 2014-04-29

1 **Supplementary Figure 1. Rarefaction curve of microbial diversity for the microbiota from**  
2 **lavage samples.** Rarefaction curves of (a) observed species, (b) Chao1 and (c) phylogenetic  
3 diversity for microbiota (mean  $\pm$  95% CI) were plotted at different sequencing depths.

4  
5 **Supplementary Figure 2. Shifts of mucosal microbial composition in secretor and non-**  
6 **secretor individuals.** (a) Communities clustered using PCoA of the unweighted UniFrac distance  
7 matrix. Each colored point corresponds to a sample. (b) Phylum level microbial compositions of  
8 *SeSe*, *Sese* and *sese* individuals (mean  $\pm$  s.d.). The bacterial community from lavage sample mainly  
9 consisted of Bacteroidetes (46.59%), Firmicutes (34.8%), Proteobacteria (14.6%),  
10 Verrucomicrobia (1.4%) and Tenericutes (1.4%). Only predominant phyla with relative  
11 abundances higher than 1% were depicted in the bar graph. \*: Kruskal-Wallis test, FDR-corrected  
12  $P < 0.25$ . Shifts at the whole-phylum level were observed in *SeSe* individuals, including decreased  
13 relative abundances of Bacteroidetes, accompanied by increase of Firmicutes as compared with  
14 *Sese* individuals. When compared with *sese* individuals, *SeSe* subjects harbored more Firmicutes  
15 and Fusobacteria. In secretors, the trend of lower abundances of Proteobacteria can also be  
16 observed.

17  
18 **Supplementary Figure 3. Procrustes analysis on the Bray-Curtis PCoA plots derived from**  
19 **16S and imputed metagenomic datasets.** The clustering of samples are not consistent using these  
20 two datasets ( $P = 0.510$ ), suggesting more profound variations at metagenomic level.

21  
22 **Supplementary Figure 4. Relative abundances of metabolic pathways enriched in *Sese* or *sese***  
23 **individuals.** The differentially abundant pathways (**Supplementary Dataset 2**) that are not shown

24 in **Figure 1c** are plotted. Compared to *SeSe* individuals, 10 pathways are enriched in *sese*  
25 individuals, and 5 are enriched in *Sese* individuals.

26  
27 **Supplementary Figure 5. Relative abundances of metabolic pathways enriched in *SeSe***  
28 **individuals.** The differentially abundant pathways (**Supplementary Dataset 2**) that are not shown  
29 in **Figure 1c** are plotted. In *SeSe* individuals, 20 pathways are enriched compared to *sese*  
30 individuals, and 5 are enriched compared to *Sese* individuals.

31  
32 **Supplementary Figure 6. Metabolic pathways enriched in *SeSe* individuals.** The 5 KEGG  
33 metabolic pathways that are enriched in *SeSe* individuals compared to *Sese* individuals  
34 (**Supplementary Figure 4**) are highlighted in light blue; the 20 pathways that are enriched in *SeSe*  
35 individuals compared to *sese* individuals (**Supplementary Figure 4**) are highlighted in blue; the 7  
36 pathways (**Figure 1c**) that are enriched in *SeSe* individuals compared to both *Sese* and *sese*  
37 individuals are highlighted in dark blue.

38  
39 **Supplementary Figure 7. Metabolic pathways enriched in *Sese* or *sese* individuals in**  
40 **comparison to *SeSe* individuals.** The 5 KEGG metabolic pathways that are enriched in *Sese*  
41 individuals (**Supplementary Figure 3**) are highlighted in yellow; the 10 pathways that are enriched  
42 in *sese* individuals (**Supplementary Figure 3**) are highlighted in orange; the 5 pathways (**Figure**  
43 **1c**) that are enriched in both *Sese* and *sese* individuals are highlighted in red.

44  
45 **Supplementary Figure 8. Identification of functional microbial communities.** The hierarchical  
46 clustering dendrograms of 97% OTUs based on microbial co-occurrence network using is shown.  
47 In the dendrograms, each color represents one FMC, and each branch represents one OTU.

48

49 **Supplementary Table 1. Demographic information of the cohort**

50

51 **Supplementary Dataset 1. OTU significance results between *SeSe*, *Sese* and *sese* individuals.**

52 Pair-wise comparison of relative abundances of OTUs in *SeSe*, *Sese* and *sese* individuals. At lower  
53 taxonomic levels, we filtered out low-abundance OTUs based on the criteria of 1) present in at least  
54 50% of samples and 2) a minimum count of 30 reads. After this step, 419 OTUs remained, and 19  
55 (4.5%) of them were concordantly enriched in *SeSe* individuals when compared with either *Sese* or  
56 *sese* individuals (Kruskal-Wallis, FDR corrected  $P < 0.25$ ). Consistent with the phylum level  
57 variations, these OTUs represented different clades of Firmicutes, namely *Lachnospiraceae*  
58 (*Clostridium* spp., *Roseburia* spp. and *Ruminococcus* spp.), *Catabacteriaceae* and  
59 *Faecalibacterium* spp.

60

61 **Supplementary Dataset 2. KEGG pathways that differentiate *SeSe*, *Sese* and *sese* individuals**

62

63 **Supplementary Dataset 3. KEGG pathways that differentiate wild-type *FUT2*<sup>+/-</sup> and *FUT2*<sup>-/-</sup>  
64 mice**

65

66 **Supplementary Dataset 4. Module membership and intra-modular connectivity**

67

68 **Supplementary Dataset 5. Putative ID of metabolites that differentiate secretors and non-  
69 secretors in the human dataset**

Supplementary Figure 1

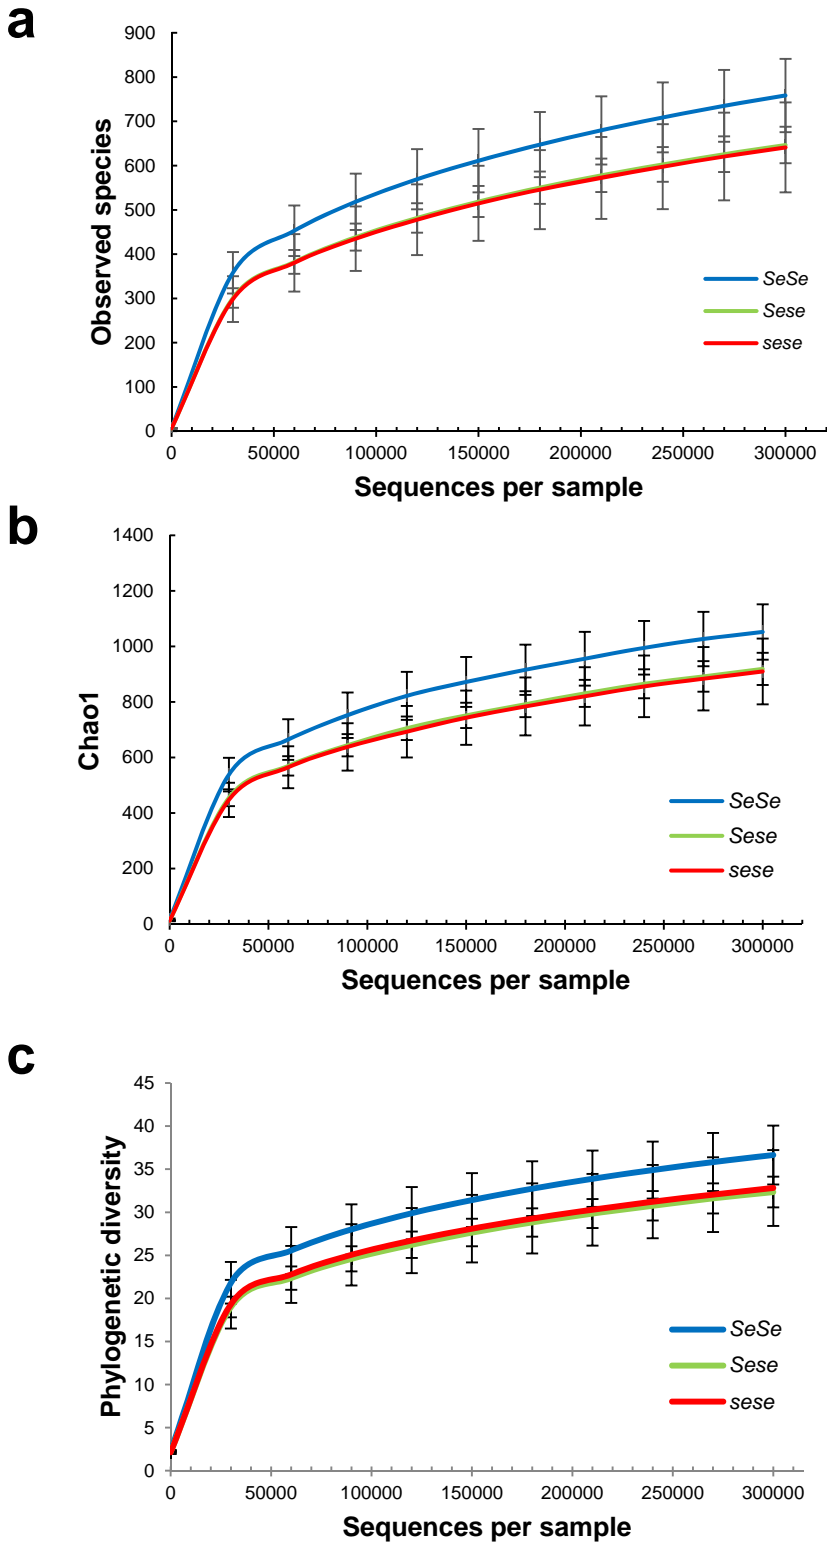

Supplementary Figure 2

**a**

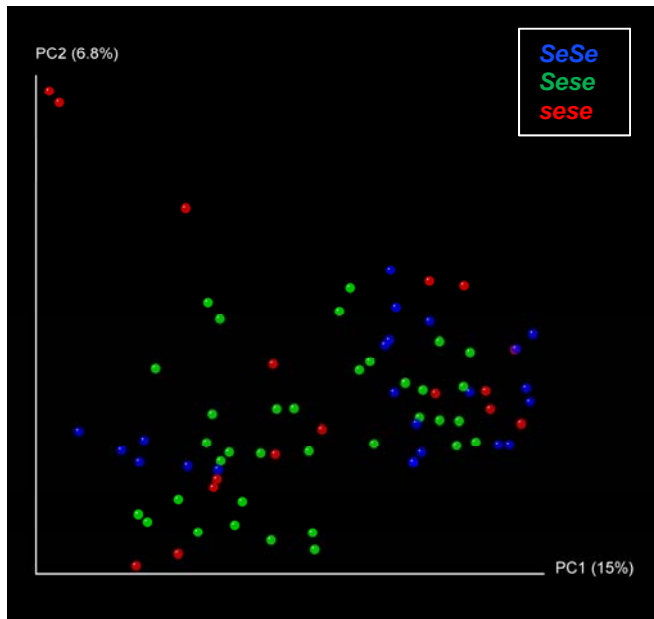

**b**

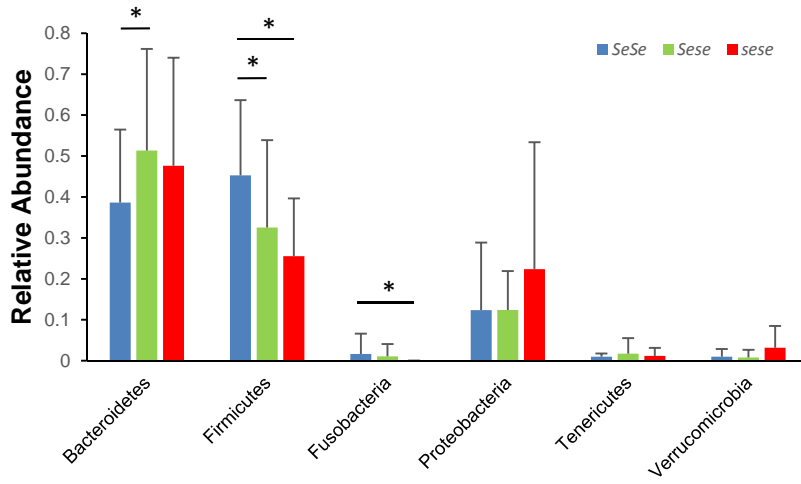

Supplementary Figure 3

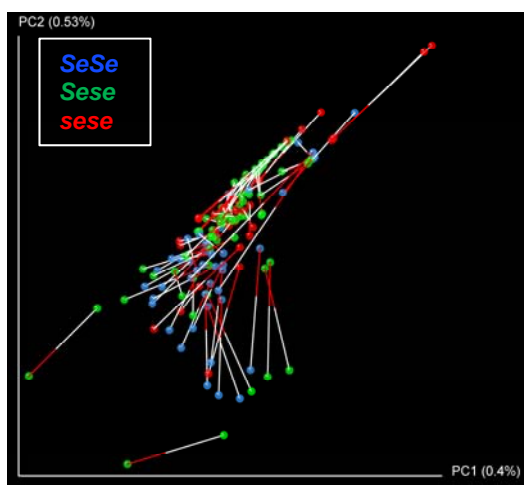

Supplementary Figure 4

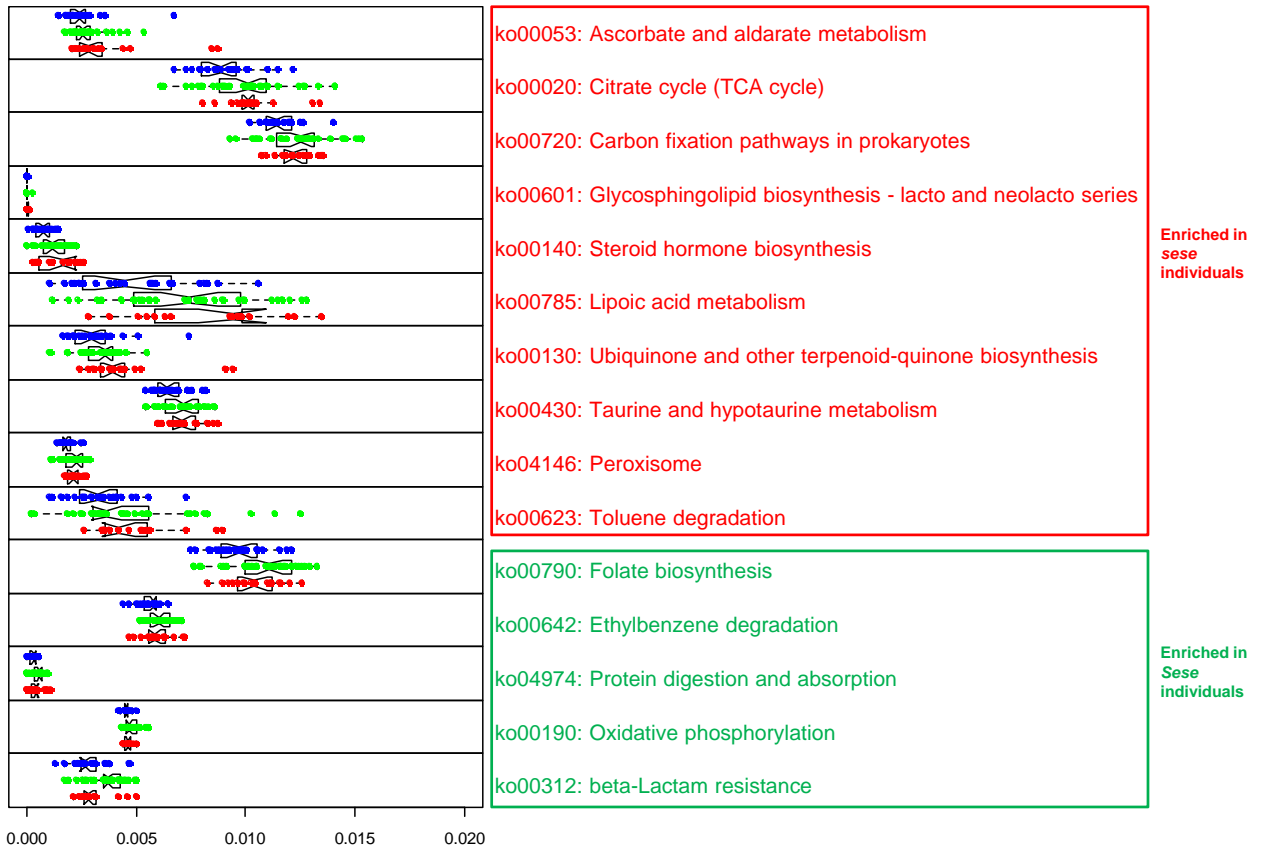

Supplementary Figure 5

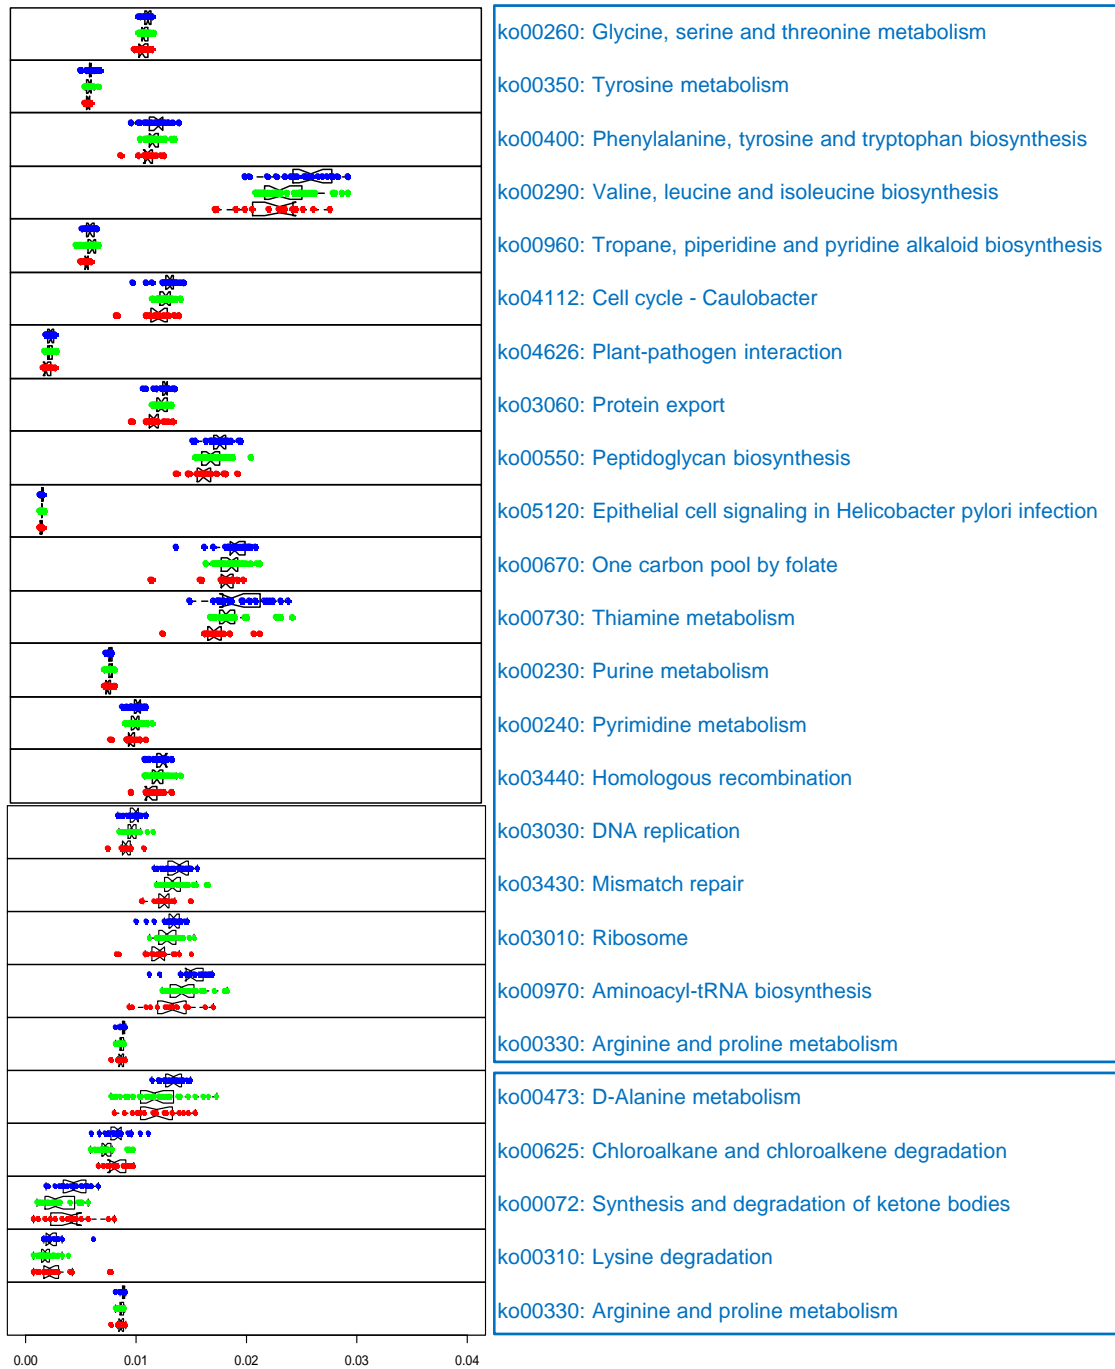



Supplementary Figure 6

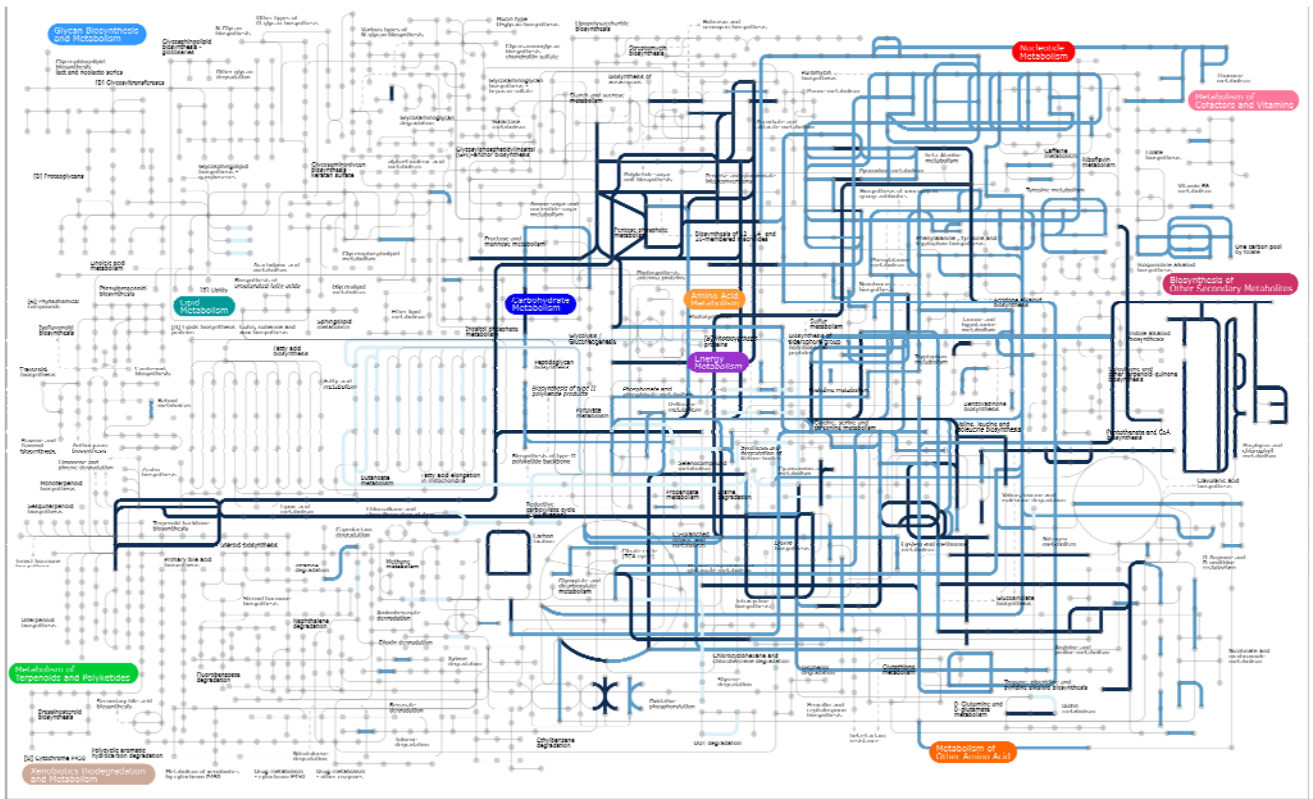

- Depleted in Sese
- Depleted in sese
- Depleted in both

Supplementary Figure 7

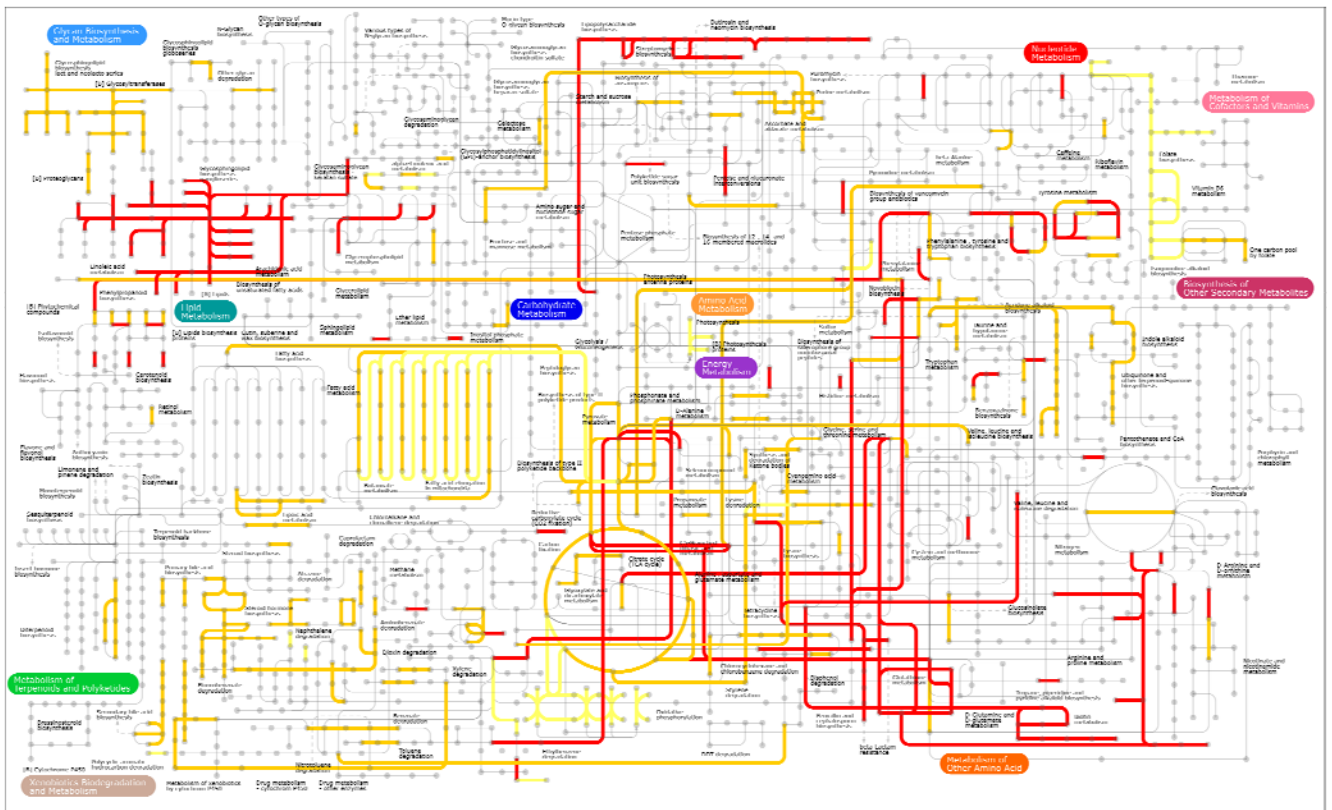

— Enriched in Sese  
— Enriched in sese  
— Enriched in both

# Supplementary Figure 8

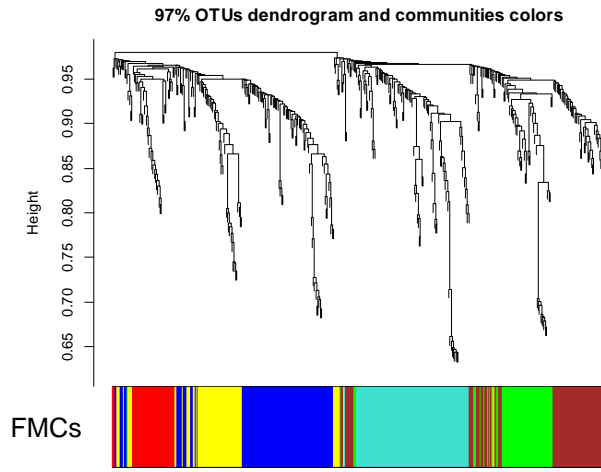

Supplement: ismej201464x2.pdf [file ismej201464x2.pdf]
